# Supplementary material for: Efficacy and safety of EUS-guided gastroenterostomy for benign and malignant gastric outlet obstruction: a systematic review and meta-analysis
Source: PubMed Central journal article supplement — Endosc Int Open. 2019 Oct 23;7(11):E1474–82. doi: 10.1055/a-0996-8178 (PMC6811354; doi:10.1055/a-0996-8178), 2019-10-23

## Supplementary Material

**Supplemental Fig. 1** Gastric outlet obstruction scoring system pre and post-EUS-guided gastroenterostomy.

### Gastric Outlet Obstruction Scoring System (GOOSS) Pre and Post-EUS-GE

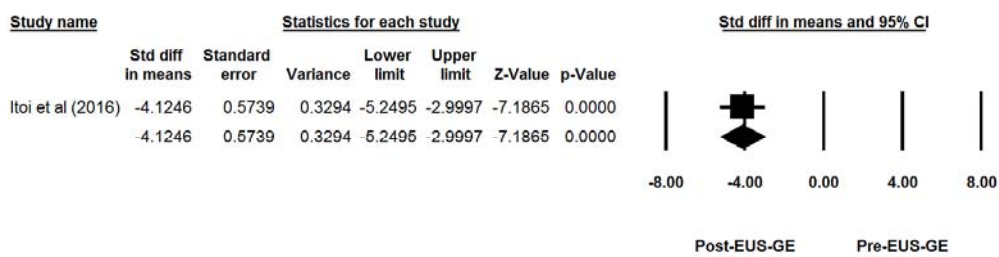

Meta Analysis

**Supplemental Fig. 2a** Overall adverse event rate for EUS-guided gastroenterostomy for the treatment of gastric outlet obstruction.

**Supplemental Fig. 2b** Minor adverse events for EUS-guided gastroenterostomy for the treatment of gastric outlet obstruction.

### Overall Complication Rate of EUS-GE

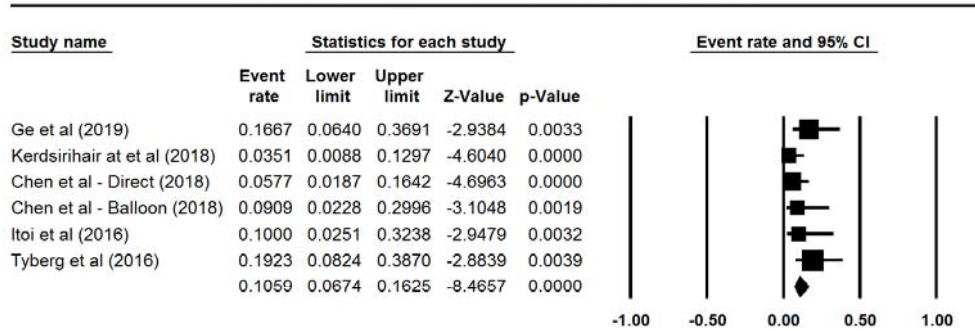

### Minor Adverse Event Rate of EUS-GE

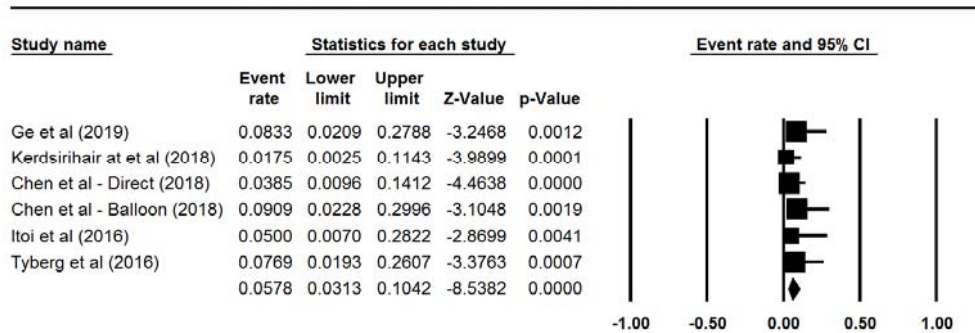

Supplement: 1627supmat-10-1055-a-0996-8178.pdf [file 1627supmat-10-1055-a-0996-8178.pdf]
